# Supplementary material for: Long-Term Trends in Ischemic Stroke Incidence and Risk Factors: Perspectives from an Asian Stroke Registry
Source: PubMed Central journal article supplement — J Stroke. 2020 Aug 10;22(3):396–9. doi: 10.5853/jos.2020.00878 (PMC7568973; doi:10.5853/jos.2020.00878), 2020-08-10
Supplement: jos-2020-00878-suppl.pdf [file jos-2020-00878-suppl.pdf]

**Supplementary Table 1.** Demographic data of Singapore residents between 2005 and 2016

|              | 2005–2007        | 2008–2010         | 2011–2013         | 2014–2016         | <i>P</i> |
|--------------|------------------|-------------------|-------------------|-------------------|----------|
| All          | 10,576,790 (100) | 11,148,256 (100)  | 11,452,207 (100)  | 11,706,988 (100)  |          |
| Sex          |                  |                   |                   |                   |          |
| Male         | 5,244,858 (49.6) | 5,508,857 (49.4)  | 5,639,720 (49.2)  | 5,748,564 (49.1)  | 0.010    |
| Female       | 5,331,932 (50.4) | 5,639,399 (50.6)  | 5,812,487 (50.8)  | 5,958,424 (50.9)  |          |
| Ethnic group |                  |                   |                   |                   |          |
| Chinese      | 7,970,078 (75.4) | 8,286,062 (74.3)  | 8,493,989 (74.2)  | 8,697,559 (74.3)  | 0.228    |
| Male         | 3,933,437        | 4,069,903         | 4,156,454         | 4,244,474         |          |
| Female       | 4,036,641        | 4,216,159         | 4,337,535         | 4,453,085         |          |
| Malay        | 1,457,252 (13.8) | 1,499,029 (13.4)  | 1,528,993 (13.4)  | 1,563,468 (13.4)  | 0.225    |
| Male         | 728,134          | 747,017           | 760,981           | 777,708           |          |
| Female       | 729,118          | 752,012           | 768,012           | 785,760           |          |
| Indian       | 907,622 (8.6)    | 1,015,059 (9.1)   | 1,051,728 (9.2)   | 1,064,849 (9.1)   | 0.237    |
| Male         | 467,043          | 525,605           | 542,385           | 546,598           |          |
| Female       | 440,579          | 489,454           | 509,343           | 518,251           |          |
| Age (yr)     |                  |                   |                   |                   | 0.036    |
| <65          | 9,696,785 (91.7) | 10,163,947 (91.2) | 10,316,489 (90.1) | 10,322,427 (88.2) |          |
| ≥65          | 880,005 (8.3)    | 984,309 (8.8)     | 1,135,718 (9.9)   | 1,378,886 (11.8)  |          |

Values are presented as number (%).
